# Supplementary material
Source: PubMed Central journal article supplement (PMC6425926)
Supplement: Supp_Table1.pdf [file Supp_Table1.pdf]

## Supplementary Data

SUPPLEMENTARY TABLE S1. PREVALENCE AND CORRELATES OF A FIBROMYALGIA DIAGNOSIS  
AMONG VETERANS IN FY 2012

|                                           | <i>No fibromyalgia</i>      | <i>Fibromyalgia</i>     | <i>Cohen's D</i>  |
|-------------------------------------------|-----------------------------|-------------------------|-------------------|
|                                           | <i>N=2,139,534 (96.52%)</i> | <i>N=77,087 (3.48%)</i> |                   |
|                                           | <i>Mean (SD)</i>            | <i>Mean (SD)</i>        |                   |
| Demographics                              | 58.83 (15.43)               | 55.12 (14.11)           | 0.25*             |
|                                           | N (%)                       | N (%)                   | <i>Risk ratio</i> |
| Age                                       |                             |                         |                   |
| <40                                       | 283,599 (13.3)              | 11,650 (15.1)           | 1.14              |
| 40–49                                     | 256,491 (12)                | 14,501 (18.8)           | 1.57*             |
| 50–64                                     | 896,215 (41.9)              | 34,355 (44.6)           | 1.06              |
| 65–74                                     | 391,435 (18.3)              | 10,394 (13.5)           | 0.74              |
| 75–85                                     | 206,057 (9.6)               | 4,372 (5.7)             | 0.59              |
| >85                                       | 89,116 (4.2)                | 1,501 (1.9)             | 0.47*             |
| Male                                      | 1,974,644 (92.3)            | 57,467 (74.5)           | 0.81              |
| Female                                    | 164,890 (7.7)               | 19,620 (25.5)           | 3.3*              |
| Hispanic                                  | 134,567 (14.2)              | 5,290 (15.1)            | 1.07              |
| White                                     | 1,450,977 (76.3)            | 52,860 (76)             | 1.00              |
| Black                                     | 374,066 (20)                | 13,721 (19.7)           | 1.00              |
| Other race                                | 26,876 (1.4)                | 1,002 (1.4)             | 1.02              |
| Mixed race                                | 37,228 (2)                  | 1,564 (2.2)             | 1.15              |
| Unknown race                              | 238,987 (11.2)              | 7,489 (9.7)             | 0.87              |
| Urban Residents                           | 1,450,019 (70.4)            | 53,124 (71.6)           | 1.02              |
| Small rural area residents                | 198,665 (9.6)               | 6,849 (9.2)             | 0.96              |
| Large rural area residents                | 250,318 (12.2)              | 8,751 (11.8)            | 0.97              |
| Isolated rural area residents             | 159,809 (7.8)               | 5,464 (7.4)             | 0.95              |
| OIF/OEF Era Veterans                      | 244,756 (11.4)              | 8,604 (11.2)            | 0.98              |
| VA pension                                | 69,262 (3.2)                | 2,116 (2.7)             | 0.85              |
| Service connected ≥50%                    | 586,803 (27.4)              | 30,165 (39.1)           | 1.43              |
| Service connected <50%                    | 461,770 (21.6)              | 15,946 (20.7)           | 0.95              |
| Homeless during the year                  | 106,290 (5)                 | 4,554 (5.9)             | 1.19              |
| Medical diagnosis: general                |                             |                         |                   |
| Seizures                                  | 17,190 (0.8)                | 738 (1)                 | 1.19              |
| Insomnia                                  | 125,116 (5.8)               | 7,045 (9.1)             | 1.6*              |
| Myocardial infarction                     | 35,960 (1.7)                | 1,131 (1.5)             | 0.87              |
| Congestive heart failure                  | 1,106,856 (51.7)            | 45,115 (58.5)           | 1.13              |
| Peripheral vascular disease               | 133,872 (6.3)               | 3,772 (4.9)             | 0.78              |
| Cerebrovascular accident                  | 122,941 (5.7)               | 3,803 (4.9)             | 0.86              |
| Dementia                                  | 16,134 (0.7)                | 364 (0.5)               | 0.63              |
| Chronic obstructive airway disease        | 337,622 (15.8)              | 13,841 (18)             | 1.14              |
| Connective tissue disease                 | 27,735 (1.3)                | 3,413 (4.4)             | 3.42*             |
| Peptic ulcer disease                      | 21,601 (1)                  | 827 (1.1)               | 1.06              |
| Hepatic disease                           | 75,640 (3.5)                | 2,753 (3.6)             | 1.01              |
| Diabetes mellitus                         | 568,651 (26.6)              | 17,239 (22.4)           | 0.84              |
| Complications of diabetes                 | 194,129 (9.1)               | 4,215 (5.5)             | 0.6               |
| Paraplegia                                | 19,874 (0.9)                | 928 (1.2)               | 1.3               |
| Renal disease                             | 131,424 (6.1)               | 3,565 (1.2)             | 0.75              |
| HIV                                       | 10,271 (0.5)                | 432 (0.6)               | 1.17              |
| Cancer                                    | 188,644 (8.8)               | 5,455 (7.1)             | 0.8               |
| Metastatic cancer                         | 17,267 (0.8)                | 433 (0.6)               | 0.7               |
|                                           | <i>Mean (SD)</i>            | <i>Mean (SD)</i>        | <i>Cohen's D</i>  |
| Charlson medical severity diagnosis index | 1.7 (2)                     | 1.64 (1.78)             | 0.03              |
|                                           | N (%)                       | N (%)                   | <i>Risk ratio</i> |
| Pain diagnoses                            |                             |                         |                   |
| Headache                                  | 214,143 (10)                | 14,631 (19)             | 1.9*              |
| Diabetic pain                             | 174,750 (8.2)               | 3,587 (4.7)             | 0.57              |

(continued)

SUPPLEMENTARY TABLE S1. (CONTINUED)

|                                                  | <i>Mean (SD)</i> | <i>Mean (SD)</i> | <i>Cohen's D</i>  |
|--------------------------------------------------|------------------|------------------|-------------------|
| Musculoskeletal pain                             | 1,059,623 (49.5) | 39,180 (50.8)    | 1.03              |
| Muscle spasm pain                                | 79,689 (3.7)     | 4,289 (5.6)      | 1.5*              |
| Herpetic pain                                    | 25,976 (1.2)     | 2,248 (2.9)      | 2.4*              |
| Psychiatric diagnoses                            |                  |                  |                   |
| Organic brain syndrome                           | 18,875 (0.9)     | 410 (0.5)        | 0.6               |
| Alcohol dependence                               | 185,629 (8.7)    | 6,230 (8.1)      | 0.93              |
| Drug dependence                                  | 146,427 (6.8)    | 6,263 (8.1)      | 1.19              |
| Schizophrenia                                    | 38,944 (1.8)     | 1,368 (1.8)      | 0.98              |
| Bipolar disorder                                 | 63,435 (3)       | 3,827 (5)        | 1.7*              |
| Major depression                                 | 186,601 (8.7)    | 12,889 (16.7)    | 1.92*             |
| Other depression (e.g., dysthymia)               | 475,390 (22.2)   | 26,896 (34.9)    | 1.57*             |
| PTSD                                             | 370,924 (17.3)   | 20,103 (26.1)    | 1.5*              |
| Anxiety disorder                                 | 265,110 (12.4)   | 15,858 (20.6)    | 1.7*              |
| Adjustment disorder                              | 104,648 (4.9)    | 5,425 (7)        | 1.44              |
| Personality disorder                             | 31,294 (1.5)     | 2,665 (3.5)      | 2.32*             |
| Other psychiatric diagnosis                      | 263,611 (12.3)   | 12,821 (16.6)    | 1.35              |
| Dual diagnosis (substance abuse or psychiatric)  | 222,267 (10.4)   | 9,050 (11.7)     | 1.13              |
| Any substance abuse diagnosis                    | 260,499 (12.2)   | 9,838 (12.8)     | 1.05              |
| Any mental health diagnosis                      | 1,046,610 (48.9) | 49,217 (63.8)    | 1.31              |
| Service use                                      |                  |                  |                   |
| Any mental health inpatient treatment            | 42,650 (2)       | 2,036 (2.6)      | 1.33              |
| Any mental health service use                    | 739,466 (35)     | 38,922 (50.5)    | 1.5*              |
|                                                  | <i>Mean (SD)</i> | <i>Mean (SD)</i> | <i>Cohen's D</i>  |
| Emergency room visits                            | 0.71 (1.8)       | 1 (2.4)          | 0.14              |
| Medical surgical visits                          | 10.4 (11.5)      | 14.32 (13.7)     | 0.31*             |
| Medical-surgical inpatient hospitalizations      | 0.06 (0.24)      | 0.1 (0.3)        | 0.15              |
| Psychiatric or substance abuse outpatient visits | 4.4 (17.36)      | 7.2 (21.59)      | 0.14              |
| All outpatient visits                            | 14.71 (21.78)    | 21.53 (27.4)     | 0.28*             |
| Psychotropic medications                         |                  |                  |                   |
| Antidepressant Prescriptions                     | 3.23 (10.5)      | 5 (11)           | 0.16              |
| Antipsychotic Prescriptions                      | 0.95 (8)         | 1.21 (6.8)       | 0.04              |
| Anxiolytic/sedative/hypnotic prescriptions       | 1.6 (4.6)        | 2.87 (6.05)      | 0.24*             |
| Stimulant prescriptions                          | 0.06 (0.95)      | 0.14 (1.32)      | 0.07              |
| Anticonvulsant/mood stabilizer prescriptions     | 0.2 (0.4)        | 0.34 (0.47)      | 0.32*             |
| Lithium                                          | 0.007 (0.08)     | 0.01 (0.1)       | 0.03              |
| All psychotropics                                | 7.7 (22.52)      | 11.87 (23.76)    | 0.18              |
| Opioids                                          | 7.06 (7.35)      | 8.43 (8.29)      | 0.17              |
|                                                  | <i>N (%)</i>     | <i>N (%)</i>     | <i>Risk ratio</i> |
| Any opioid prescription                          | 769,723 (36)     | 37,110 (48.1)    | 1.34              |

\*Cohen's D > 0.2; Risk ratio < 0.5 or > 1.5.
