# Supplementary material
Source: PubMed Central journal article supplement (PMC6425926)
Supplement: Supp_Table2.pdf [file Supp_Table2.pdf]

SUPPLEMENTARY TABLE S2. COMPARISON OF THE PREVALENCE AND CORRELATES OF A FIBROMYALGIA  
DIAGNOSIS IN FEMALE AND MALE VETERANS IN FY 2012

|                                           | <i>Female</i>       | <i>Male</i>         | <i>Cohen's D</i>  |
|-------------------------------------------|---------------------|---------------------|-------------------|
|                                           | N = 19,620 (25.45%) | N = 57,567 (74.55%) |                   |
|                                           | <i>Mean (SD)</i>    | <i>Mean (SD)</i>    |                   |
| Demographics                              | 48.5 (11.69)        | 57.37 (14.16)       | -0.68*            |
|                                           | N (%)               | N (%)               | <i>Risk ratio</i> |
| Age                                       |                     |                     |                   |
| <40                                       | 4,675 (24)          | 6,975 (12.1)        | 1.96*             |
| 40-49                                     | 5,552 (28.3)        | 8,949 (15.6)        | 1.82*             |
| 50-64                                     | 8,228 (42)          | 26,127 (46)         | 0.92              |
| 65-74                                     | 829 (4.2)           | 9,565 (16.6)        | 0.25*             |
| 75-85                                     | 220 (1.1)           | 4,152 (7.3)         | 0.16*             |
| >85                                       | 109 (0.5)           | 1,392 (2.4)         | 0.23*             |
| Hispanic                                  | 1,250 (15.4)        | 4,040 (15)          | 1.02              |
| White                                     | 12,292 (69)         | 40,568 (78.3)       | 0.88              |
| Black                                     | 4,668 (26.2)        | 9,053 (18)          | 1.5*              |
| Other race                                | 289 (1.6)           | 713 (1.4)           | 1.18              |
| Mixed race                                | 428 (2.4)           | 1,136 (2.2)         | 1                 |
| Unknown race                              | 1,819 (9.3)         | 5,670 (9.9)         | 0.94              |
| Urban residents                           | 14,279 (76)         | 38,845 (70.1)       | 1.08              |
| Small rural area residents                | 1,425 (7.6)         | 5,424 (9.8)         | 0.77              |
| Large rural area residents                | 2,069 (11)          | 6,682 (12.1)        | 0.91              |
| Isolated rural area residents             | 1,034 (5.5)         | 4,430 (8)           | 0.69              |
| OIF/OEF Era Veterans                      | 2,350 (12)          | 6,254 (10.9)        | 1.10              |
| VA Pension                                | 294 (1.5)           | 1,822 (3.2)         | 0.47*             |
| Service connected ≥50%                    | 9,424 (48)          | 20,741 (36)         | 1.33              |
| Service connected <50%                    | 4,135 (21)          | 11,811 (21)         | 1.03              |
| Homeless during the year                  | 1,301 (6.6)         | 3,253 (5.7)         | 1.17              |
| Medical diagnosis: general                |                     |                     |                   |
| Seizures                                  | 207 (1.2)           | 531 (0.9)           | 1.14              |
| Insomnia                                  | 2,107 (10.7)        | 4,938 (9)           | 1.25              |
| Myocardial infarction                     | 98 (0.5)            | 1,033 (1.8)         | 0.28*             |
| Congestive heart failure                  | 11,870 (60.5)       | 33,245 (58)         | 1.05              |
| Peripheral vascular disease               | 324 (1.7)           | 3,448 (6)           | 0.28*             |
| Cerebrovascular accident                  | 530 (2.7)           | 3,273 (5.7)         | 0.47*             |
| Dementia                                  | 35 (0.2)            | 329 (0.6)           | 0.31*             |
| Chronic obstructive airway disease        | 3,867 (19.7)        | 9,974 (17.4)        | 1.14              |
| Connective tissue disease                 | 1,408 (7.2)         | 2,005 (3.5)         | 2.06*             |
| Peptic ulcer disease                      | 167 (0.9)           | 660 (1.2)           | 0.74              |
| Hepatic disease                           | 431 (2.2)           | 2,322 (4)           | 0.54              |
| Diabetes mellitus                         | 2,694 (13.7)        | 14,545 (25.3)       | 0.54              |
| Complications of diabetes                 | 459 (2.3)           | 3,756 (6.5)         | 0.36*             |
| Paraplegia                                | 125 (0.6)           | 803 (1.4)           | 0.46*             |
| Renal disease                             | 326 (1.7)           | 3,239 (5.6)         | 0.3*              |
| HIV                                       | 32 (0.2)            | 400 (0.7)           | 0.23*             |
| Cancer                                    | 820 (4.2)           | 4,635 (8.1)         | 0.52              |
| Metastatic cancer                         | 57 (0.3)            | 376 (0.7)           | 0.44*             |
|                                           | <i>Mean (SD)</i>    | <i>Mean (SD)</i>    | <i>Cohen's D</i>  |
| Charlson medical severity diagnosis index | 1.3 (1.4)           | 1.8 (1.9)           | -0.3*             |
|                                           | N (%)               | N (%)               | <i>Risk ratio</i> |
| Pain diagnoses                            |                     |                     |                   |
| Headache                                  | 6,561 (33.4)        | 8,070 (14)          | 2.38*             |
| Diabetic pain                             | 402 (2)             | 3,185 (5.5)         | 0.37*             |

(continued)

SUPPLEMENTARY TABLE S2. (CONTINUED)

|                                                  | <i>Mean (SD)</i> | <i>Mean (SD)</i> | <i>Cohen's D</i>  |
|--------------------------------------------------|------------------|------------------|-------------------|
| Musculoskeletal pain                             | 10,787 (55)      | 28,393 (49.4)    | 1.11              |
| Skeletospasm pain                                | 1,157 (5.9)      | 3,132 (5.5)      | 1.08              |
| Herpetic pain                                    | 568 (2.9)        | 1,680 (2.9)      | 0.99              |
| Psychiatric diagnoses                            |                  |                  |                   |
| Organic brain syndrome                           | 38 (0.2)         | 372 (0.6)        | 0.3*              |
| Alcohol dependence                               | 907 (4.6)        | 5,323 (9.3)      | 0.5*              |
| Drug dependence                                  | 1,230 (6.3)      | 5,033 (8.8)      | 0.72              |
| Schizophrenia                                    | 320 (1.6)        | 1,048 (1.8)      | 0.89              |
| Bipolar disorder                                 | 1,739 (8.9)      | 2,088 (3.6)      | 2.44*             |
| Major depression                                 | 5,048 (25.7)     | 7,841 (13.6)     | 1.89*             |
| Other depression (e.g., dysthymia)               | 8,960 (45.7)     | 17,936 (31.2)    | 1.46*             |
| PTSD                                             | 5,910 (30.1)     | 14,193 (24.7)    | 1.22              |
| Anxiety disorder                                 | 5,568 (0.28)     | 10,290 (17.9)    | 1.59*             |
| Adjustment disorder                              | 1,630 (8.3)      | 3,795 (6.6)      | 1.26              |
| Personality disorder                             | 1,302 (6.6)      | 1,363 (2.4)      | 2.8*              |
| Other psychiatric diagnosis                      | 2,940 (15)       | 9,881 (17.2)     | 0.87              |
| Dual diagnosis (substance abuse or psychiatric)  | 1,699 (8.7)      | 7,351 (12.8)     | 0.68              |
| Any substance abuse diagnosis                    | 1,749 (8.9)      | 8,089 (14.1)     | 0.63              |
| Any mental health diagnosis                      | 14,502 (73.9)    | 34,715 (60.4)    | 1.22              |
| Service use                                      |                  |                  |                   |
| Any mental health inpatient treatment            | 579 (3)          | 1457 (2.5)       | 1.16              |
| Any mental health use                            | 12,072 (61.5)    | 26,850 (46.7)    | 1.32              |
|                                                  | <i>Mean (SD)</i> | <i>Mean (SD)</i> | <i>Cohen's D</i>  |
| Emergency room visits                            | 0.98 (2.11)      | 1.01 (2.38)      | -0.01             |
| Medical surgical visits                          | 14.33 (13.13)    | 14.31 (14)       | 0.001             |
| Medical-surgical inpatient hospitalizations      | 0.08 (0.27)      | 0.11 (0.31)      | 0.1               |
| Psychiatric or substance abuse outpatient visits | 8.56 (21.6)      | 6.75 (21.6)      | 0.08              |
| All outpatient visits                            | 22.9 (27.78)     | 21.06 (27.26)    | 0.07              |
| Psychotropic medications                         |                  |                  |                   |
| Antidepressant prescriptions                     | 5.95 (9.5)       | 4.68 (11.41)     | 0.12              |
| Antipsychotic prescriptions                      | 1.36 (5.73)      | 1.16 (7.09)      | 0.03              |
| Anxiolytic/Sedative/Hypnotic prescriptions       | 3.64 (6.4)       | 2.6 (5.9)        | 0.17              |
| Stimulant prescriptions                          | 0.23 (1.6)       | 0.11 (1.21)      | 0.08              |
| Anticonvulsant/mood stabilizer prescriptions     | 2.26 (6.09)      | 2.24 (9.03)      | 0.003             |
| Lithium                                          | 0.14 (1.78)      | 0.08 (1.58)      | 0.04              |
| All Psychotropics                                | 13.92 (20.26)    | 11.16 (24.8)     | 0.12              |
| Opioids                                          | 7.84 (7.5)       | 8.6 (8.5)        | -0.09             |
|                                                  | <i>N (%)</i>     | <i>N (%)</i>     | <i>Risk ratio</i> |
| Any Opioid Prescription                          | 9,622 (49)       | 27,488 (47.8)    | 1.03              |

\*Cohen's  $D > 0.2$ ; Risk ratio  $< 0.5$  or  $> 1.5$ .
